# Supplementary material for: Plasma C-Peptide and Risk of Developing Type 2 Diabetes in the General Population
Source: PubMed Central journal article supplement (PMC7564789; doi:10.3390/jcm9093001), 2020-09-17
Supplement: jcm-09-03001-s001.pdf [file jcm-09-03001-s001.pdf]

Table S1. Multivariable adjusted linear regression analyses with log-transformed C-peptide as dependent variable in 5176 participants of the PREVEND study.

| Variables                               | Age- and sex-adjusted |                | Age-, sex-, and insulin-adjusted |                | Multivariable adjusted (R <sup>2</sup> =0.721) |                |
|-----------------------------------------|-----------------------|----------------|----------------------------------|----------------|------------------------------------------------|----------------|
|                                         | Standardized $\beta$  | <i>p</i> value | Standardized $\beta$             | <i>p</i> value | Standardized $\beta$                           | <i>p</i> value |
| Sex, female vs. male                    | —                     | —              | —                                | —              | 0.040                                          | <0.001         |
| Age, years                              | —                     | —              | —                                | —              | ...                                            | ...            |
| Family history of diabetes, yes vs. no  | 0.071                 | <0.001         | 0.033                            | <0.001         | ...                                            | ...            |
| Alcohol, yes vs. no                     | -0.09                 | <0.001         | ...                              | ...            | ...                                            | ...            |
| BMI, kg/m <sup>2</sup>                  | 0.530                 | <0.001         | 0.179                            | <0.001         | 0.120                                          | <0.001         |
| Systolic blood pressure, mm Hg          | 0.235                 | <0.001         | 0.060                            | <0.001         | -0.039                                         | 0.002          |
| Dystolic blood pressure, mm Hg          | 0.207                 | <0.001         | 0.072                            | <0.001         | 0.056                                          | <0.001         |
| Antihypertensive medication, yes vs. no | 0.202                 | <0.001         | 0.07                             | <0.001         | ...                                            | ...            |
| Total cholesterol, mmol/L               | 0.108                 | <0.001         | 0.023                            | <0.001         | ...                                            | ...            |
| HDL cholesterol, mmol/L                 | -0.416                | <0.001         | -0.143                           | <0.001         | -0.052                                         | <0.001         |
| Triglycerides, mmol/L                   | 0.458                 | <0.001         | 0.181                            | <0.001         | 0.140                                          | <0.001         |
| Lipid-lowering medication, yes vs. no   | 0.132                 | <0.001         | 0.046                            | <0.001         | ...                                            | ...            |
| Plasma ASAT (U/L)                       | 0.150                 | <0.001         | ...                              | ...            | -0.070                                         | <0.001         |
| Plasma ALAT (U/L)                       | 0.333                 | <0.001         | 0.084                            | <0.001         | 0.103                                          | <0.001         |
| Glucose, mmol/L                         | 0.336                 | <0.001         | 0.113                            | <0.001         | 0.096                                          | <0.001         |
| Insulin (Mu/L)                          | 0.754                 | <0.001         | —                                | —              | 0.549                                          | <0.001         |
| eGFR, mL/min/1.73 m <sup>2</sup>        | -0.275                | <0.001         | -0.162                           | <0.001         | -0.151                                         | <0.001         |
| Urinary albumin excretion, mg/24 hours  | 0.161                 | <0.001         | 0.061                            | <0.001         | 0.029                                          | 0.001          |

ASAT: L-aspartate aminotransferase; ALAT: L-alanine aminotransferase; eGFR: estimated glomerular filtration rate; PREVEND: Prevention of renal and vascular End-stage Disease

Table S2. Additive Value of C-Peptide and Insulin, for the Prediction of Type 2 Diabetes

|                           | C-statistics (95% CI) | <i>p</i> value for change in C-statistics |
|---------------------------|-----------------------|-------------------------------------------|
| FOS risk model            | 0.888 (0.870-0.907)   |                                           |
| Fos risk model+ C-peptide | 0.891 (0.873-0.909)   | 0.04                                      |
| Fos risk model+ insulin   | 0.889 (0.870-0.908)   | 0.27                                      |

FOS: Framingham Offspring risk score

**A)**

Overall ( $n = 5176$ ;  $e = 289$ )  
 Gender = Female ( $n = 2598$ ;  $e = 105$ )  
 Gender = Male ( $n = 2578$ ;  $e = 184$ )  
 Age < 57 ( $n = 3457$ ;  $e = 145$ )  
 Age  $\geq 57$  ( $n = 1719$ ;  $e = 144$ )  
 BMI < 29 kg/m<sup>2</sup> ( $n = 4039$ ;  $e = 145$ )  
 BMI  $\geq 29$  kg/m<sup>2</sup> ( $n = 1137$ ;  $e = 144$ )  
 eGFR < 90 mL/min/1.73 m<sup>2</sup> ( $n = 1991$ ;  $e = 143$ )  
 eGFR  $\geq 90$  mL/min/1.73 m<sup>2</sup> ( $n = 3185$ ;  $e = 146$ )  
 UAE < 15 mg/ 24 h ( $n = 3915$ ;  $e = 161$ )  
 UAE  $\geq 15$ mg/ 24 h ( $n = 1261$ ;  $e = 128$ )  
 Glucose < 5.7 mmol/L ( $n = 4671$ ;  $e = 133$ )  
 Glucose  $\geq 5.7$  mmol/L ( $n = 505$ ;  $e = 156$ )  
 Insulin < 13.5 mU/L ( $n = 4188$ ;  $e = 145$ )  
 Insulin  $\geq 13.5$  mU/L ( $n = 988$ ;  $e = 146$ )  
 Hypertension = no ( $n = 3753$ ;  $e = 125$ )  
 Hypertension = yes ( $n = 1423$ ;  $e = 164$ )

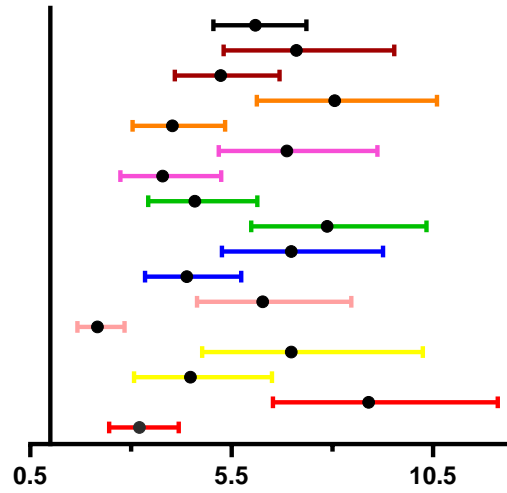

**B)**

Overall ( $n = 5176$ ;  $e = 289$ )  
 Gender = Female ( $n = 2598$ ;  $e = 105$ )  
 Gender = Male ( $n = 2578$ ;  $e = 184$ )  
 Age < 57 ( $n = 3457$ ;  $e = 145$ )  
 Age  $\geq 57$  ( $n = 1719$ ;  $e = 144$ )  
 BMI < 29 kg/m<sup>2</sup> ( $n = 4039$ ;  $e = 145$ )  
 BMI  $\geq 29$  kg/m<sup>2</sup> ( $n = 1137$ ;  $e = 144$ )  
 eGFR < 90 mL/min/1.73 m<sup>2</sup> ( $n = 1991$ ;  $e = 143$ )  
 eGFR  $\geq 90$  mL/min/1.73 m<sup>2</sup> ( $n = 3185$ ;  $e = 146$ )  
 UAE < 15 mg/ 24 h ( $n = 3915$ ;  $e = 161$ )  
 UAE  $\geq 15$ mg/ 24 h ( $n = 1261$ ;  $e = 128$ )  
 Glucose < 5.7 mmol/L ( $n = 4671$ ;  $e = 133$ )  
 Glucose  $\geq 5.7$  mmol/L ( $n = 505$ ;  $e = 156$ )  
 Insulin < 13.5 mU/L ( $n = 4188$ ;  $e = 145$ )  
 Insulin  $\geq 13.5$  mU/L ( $n = 988$ ;  $e = 146$ )  
 Hypertension = no ( $n = 3753$ ;  $e = 125$ )  
 Hypertension = yes ( $n = 1423$ ;  $e = 164$ )

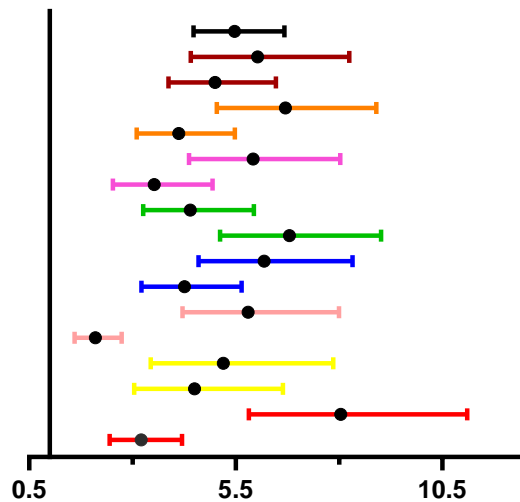

**C)**

Overall ( $n = 5176$ ;  $e = 281$ )  
 Age < 57 ( $n = 3457$ ;  $e = 126$ )  
 Age  $\geq 57$  ( $n = 1719$ ;  $e = 126$ )  
 BMI < 29 kg/m<sup>2</sup> ( $n = 4039$ ;  $e = 145$ )  
 BMI  $\geq 29$  kg/m<sup>2</sup> ( $n = 1137$ ;  $e = 144$ )  
 eGFR < 90 mL/min/1.73 m<sup>2</sup> ( $n = 1991$ ;  $e = 143$ )  
 eGFR  $\geq 90$  mL/min/1.73 m<sup>2</sup> ( $n = 3185$ ;  $e = 146$ )  
 UAE < 15 mg/ 24 h ( $n = 3915$ ;  $e = 161$ )  
 UAE  $\geq 15$ mg/ 24 hours ( $n = 1261$ ;  $e = 128$ )  
 Glucose < 5.7 mmol/L ( $n = 4671$ ;  $e = 133$ )  
 Glucose  $\geq 5.7$  mmol/L ( $n = 505$ ;  $e = 156$ )  
 Insulin < 13.5 mU/L ( $n = 4188$ ;  $e = 145$ )  
 Insulin  $\geq 13.5$  mU/L ( $n = 988$ ;  $e = 146$ )  
 Hypertension = no ( $n = 3539$ ;  $e = 109$ )  
 Hypertension = yes ( $n = 1282$ ;  $e = 143$ )

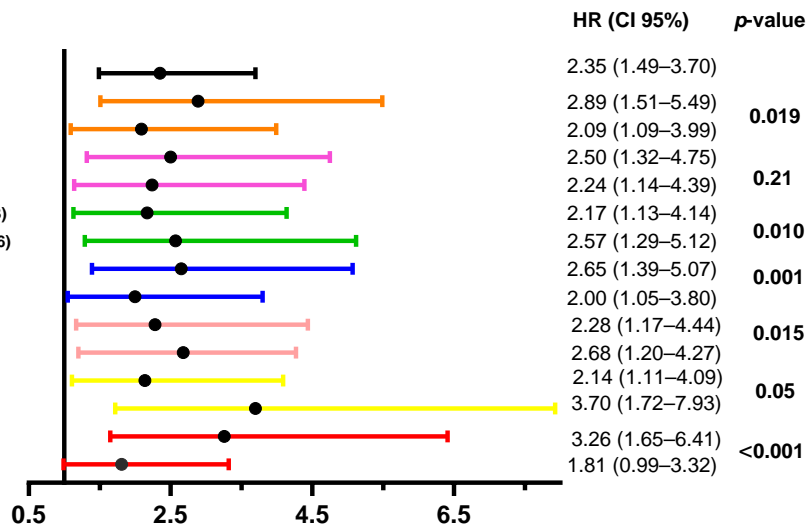

Figure S1. Association between C-peptide and risk of diabetes in the overall population and stratified by selected characteristics ( $n$  = number of subjects;  $e$  = number of cases). Multivariable hazard ratios (95% confidence

intervals) for risk of diabetes are expressed per  $\text{Log}_2$ -unit increase of C-peptide levels. Hazard ratios (95 CIs) were derived from Cox proportional hazards regression models with crude analyses in panel (A), adjusted for age, sex in panel (B), and adjusted for age, sex, smoking status, alcohol consumption, BMI, family history of diabetes, hypertension, triglycerides, total cholesterol, HDL cholesterol, eGFR, urinary albumin excretion, glucose and insulin in panel (C). The  $p$ -values denote the  $p$  for interaction. BMI: body mass index; HDL: high-density lipoprotein; eGFR: estimated glomerular filtration rate; UAE: urinary albumin excretion

Table S3. Competing risk model of C-peptide to mortality and incident Type 2 Diabetes in 5176 participants without diabetes.

|                      | Subhazard Ratio (95% CI) | <i>p</i> value |
|----------------------|--------------------------|----------------|
| Crude analysis       | 5.96 (4.91–7.23)         | <0.001         |
| Model1 <sup>†</sup>  | 5.48 (4.42–6.74)         | <0.001         |
| Model2 <sup>‡</sup>  | 5.31 (4.29–6.57)         | <0.001         |
| Model3 <sup>§</sup>  | 3.47 (2.67–4.52)         | <0.001         |
| Model4 <sup>  </sup> | 2.88 (2.15–3.87)         | <0.001         |
| Model5 <sup>¶</sup>  | 3.29 (2.39–4.52)         | <0.001         |
| Model6 <sup>#</sup>  | 2.33 (1.49–3.65)         | <0.001         |

Subhazard Ratio (95% CIs) were derived from competing risk analyses by Fine and Gray .

<sup>†</sup>Model 1 is adjusted for age and sex.

<sup>‡</sup>Model 2 is additionally adjusted for smoking status and alcohol consumption.

<sup>§</sup>Model 3 is additionally adjusted for BMI, family history of diabetes and hypertension.

<sup>||</sup>Model 4 is additionally adjusted for triglycerides, total cholesterol and HDL cholesterol.

<sup>¶</sup>Model 5 is additionally adjusted for eGFR and urinary albumin excretion.

<sup>#</sup>Model 6 is additionally adjusted for glucose and insulin.

eGFR: estimated glomerular filtration rate; PREVEND: Prevention of renal and vascular End-stage Disease.

Table S4. Association between C-peptide and risk of developing Type 2 Diabetes in 5,176 participants of the PREVEND study\*

|                      | Sex specific tertiles of plasma C-peptide, pmol/L |            |                  | C-peptide per Log <sub>2</sub> unit increase | <i>p</i> value   |        |
|----------------------|---------------------------------------------------|------------|------------------|----------------------------------------------|------------------|--------|
|                      | Male                                              | <642       | 642-890          |                                              |                  | >890   |
|                      | Female                                            | <592       | 592-803          | >803                                         |                  |        |
|                      |                                                   | 1          | 2                | 3                                            |                  |        |
| Cases                |                                                   | 19         | 57               | 213                                          | 289              |        |
| Crude analysis       |                                                   | 1.00 (ref) | 3.06 (1.81-5.17) | 12.61(7.84-20.26)                            | 7.10 (5.63-8.94) | <0.001 |
| Model1 <sup>†</sup>  |                                                   | 1.00 (ref) | 2.91 (1.72-4.93) | 11.54 (7.13-18.69)                           | 6.60 (5.19-8.40) | <0.001 |
| Model2 <sup>‡</sup>  |                                                   | 1.00 (ref) | 2.87 (1.70-4.87) | 11.21(6.92-18.16)                            | 6.46 (5.07-8.22) | <0.001 |
| Model3 <sup>§</sup>  |                                                   | 1.00 (ref) | 2.19 (1.29-3.73) | 5.55 (3.32-9.28)                             | 4.07 (3.07-5.39) | <0.001 |
| Model4 <sup>  </sup> |                                                   | 1.00 (ref) | 2.07(1.18-3.63)  | 4.29 (2.45-7.51)                             | 3.42 (2.49-4.70) | <0.001 |
| Model5 <sup>¶</sup>  |                                                   | 1.00 (ref) | 1.99(1.12-3.49)  | 4.09 (2.33-7.19)                             | 3.89(2.78-5.46)  | <0.001 |
| Model6 <sup>#</sup>  |                                                   | 1.00 (ref) | 1.64(0.91-2.95)  | 2.19 (1.15-4.18)                             | 2.43(1.43-4.13)  | 0.001  |

\*ORs (95% CIs) were derived from design-based logistic regression models.

<sup>†</sup>Model 1 is adjusted for age and sex.

<sup>‡</sup>Model 2 is additionally adjusted for smoking status and alcohol consumption.

<sup>§</sup>Model 3 is additionally adjusted for BMI, family history of diabetes and hypertension.

<sup>||</sup>Model 4 is additionally adjusted for triglycerides, total cholesterol and HDL cholesterol.

<sup>¶</sup>Model 5 is additionally adjusted for eGFR and urinary albumin excretion.

<sup>#</sup>Model 6 is additionally adjusted for glucose and insulin.

eGFR: estimated glomerular filtration rate; PREVEND: Prevention of renal and vascular End-stage Disease.
